# Supplementary material for: Modified hierarchical TiO2 NTs for enhanced gas phase photocatalytic activity
Source: Royal Society of Chemistry journal article supplement (doi:10.1039/c5ra05981j), 2015-01-01
Supplement: c5ra05981j1.pdf [file c5ra05981j1.pdf]

## Supporting Information

### Modified hierarchical TiO<sub>2</sub> NTs for enhanced gas phase photocatalytic activity

Di Gu, Hongjun Wu\*, Yanji Zhu and Baohui Wang

#### 1. NMNs modified hierarchical TiO<sub>2</sub> NTs

The Ag nanoparticles were decorated on the TiO<sub>2</sub> NTs by a photocatalytic reduction method using AgNO<sub>3</sub>. The TiO<sub>2</sub> NTs were soaked into the precursor solution (0.5×10<sup>-2</sup> mol/L, 1.0×10<sup>-2</sup> mol/L, 1.5×10<sup>-2</sup> mol/L AgNO<sub>3</sub> aqueous solution) for 24 h and then were irradiated in this solution with a 300 W high pressure mercury lamp for 30 min to reduce the absorbed Ag<sup>+</sup> to Ag<sup>0</sup> by photocatalysis at the expense of water oxidation.<sup>1</sup> Variation of the peak height of 2360 cm<sup>-1</sup> corresponding to the normal vibration of CO<sub>2</sub> molecules derived from the FTIR transmittance spectra with the irradiation time was shown in fig. 1s.

The Au nanoparticles were decorated on the TiO<sub>2</sub> NTs by a photocatalytic reduction method using HAuCl<sub>4</sub>. The TiO<sub>2</sub> NTs were soaked into the precursor solution (1.21×10<sup>-4</sup> mol/L, 2.43×10<sup>-4</sup> mol/L, 3.64×10<sup>-4</sup> mol/L HAuCl<sub>4</sub> aqueous solution) for 24 h and then were irradiated in this solution with a 300 W high pressure mercury lamp for 30 min to reduce the absorbed Au<sup>3+</sup> to Au<sup>0</sup> by photocatalysis at the expense of water oxidation. Variation of the peak height of 2360 cm<sup>-1</sup> corresponding to the normal vibration of CO<sub>2</sub> molecules derived from the FTIR transmittance spectra with the irradiation time was shown in fig. 2s.

The Pt nanoparticles were decorated on the TiO<sub>2</sub> NTs by a photocatalytic reduction method using Pt(AcAc)<sub>2</sub>. The TiO<sub>2</sub> NTs were soaked into the precursor solution (0.5 ×10<sup>-3</sup>mol/L, 1.0×10<sup>-3</sup> mol/L, 1.5×10<sup>-3</sup> mol/L Pt(AcAc)<sub>2</sub> aqueous solution) for 24 h and then were irradiated in this solution with a 300 W high pressure mercury lamp for 30 min to reduce the absorbed Pt<sup>2+</sup> to Pt<sup>0</sup> by photocatalysis at the expense of water oxidation. Variation of the peak height of 2360 cm<sup>-1</sup> corresponding to the normal vibration of CO<sub>2</sub> molecules derived from the FTIR transmittance spectra with the irradiation time was shown in fig. 3s.

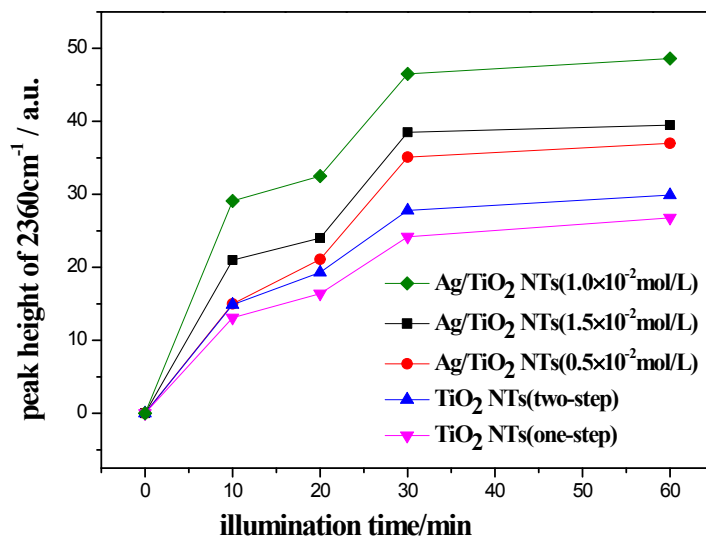

**Fig. S1.** Variation of the peak height of  $2360\text{ cm}^{-1}$  corresponding to the normal vibration of  $\text{CO}_2$  molecules derived from the FTIR transmittance spectra with the irradiation time

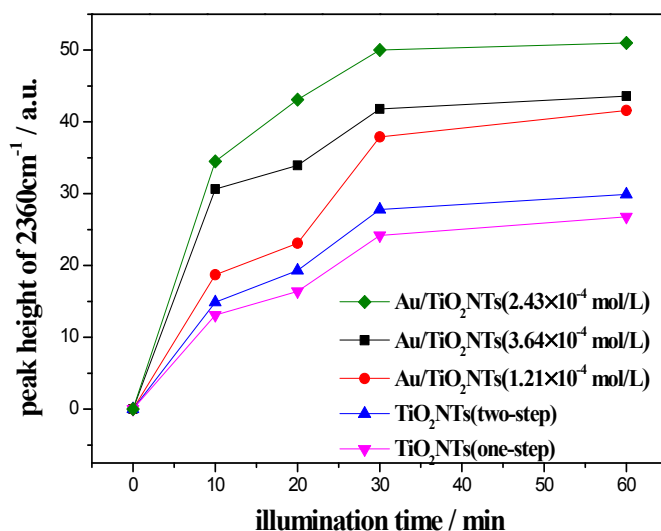

**Fig. S2.** Variation of the peak height of  $2360\text{ cm}^{-1}$  corresponding to the normal vibration of  $\text{CO}_2$  molecules derived from the FTIR transmittance spectra with the irradiation time.

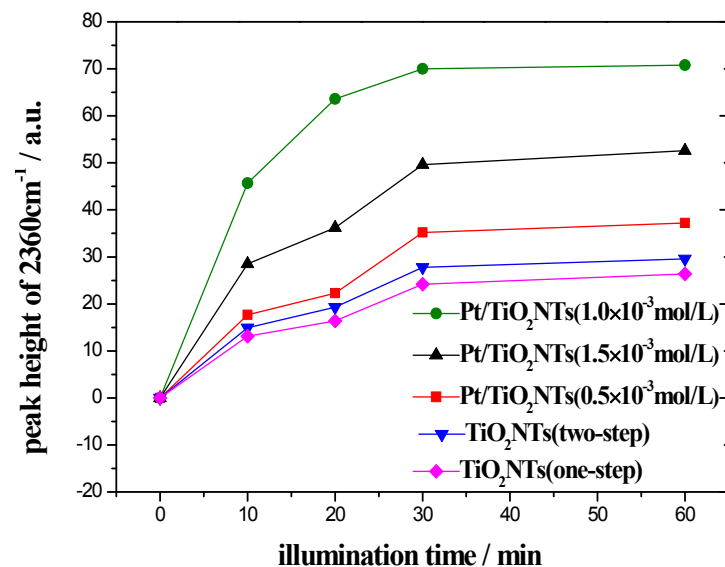

**Fig. S3.** Variation of the peak height of  $2360\text{ cm}^{-1}$  corresponding to the normal vibration of  $\text{CO}_2$  molecules derived from the FTIR transmittance spectra with the irradiation time.

Clearly, the  $\text{Ag/TiO}_2$  NTs soaked in  $1.0 \times 10^{-2}$  mol/L  $\text{AgNO}_3$  aqueous solution, the  $\text{Au/TiO}_2$  NTs soaked in  $2.43 \times 10^{-4}$  mol/L  $\text{HAuCl}_4$  aqueous solution, the  $\text{Pt/TiO}_2$  NTs soaked in  $1 \times 10^{-3}$  mol/L  $\text{Pt}(\text{AcAc})_2$  aqueous solution showed the the biggest decomposition rate and highest gas phase PC activity within the range of concentration.

## 2. Experimental facility

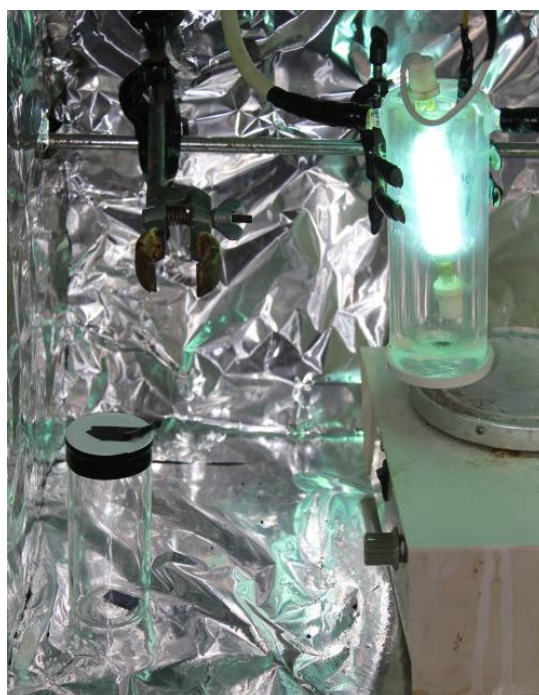

**Fig. S4.** Experimental facility

### 3. Morphology of TiO<sub>2</sub> NTs

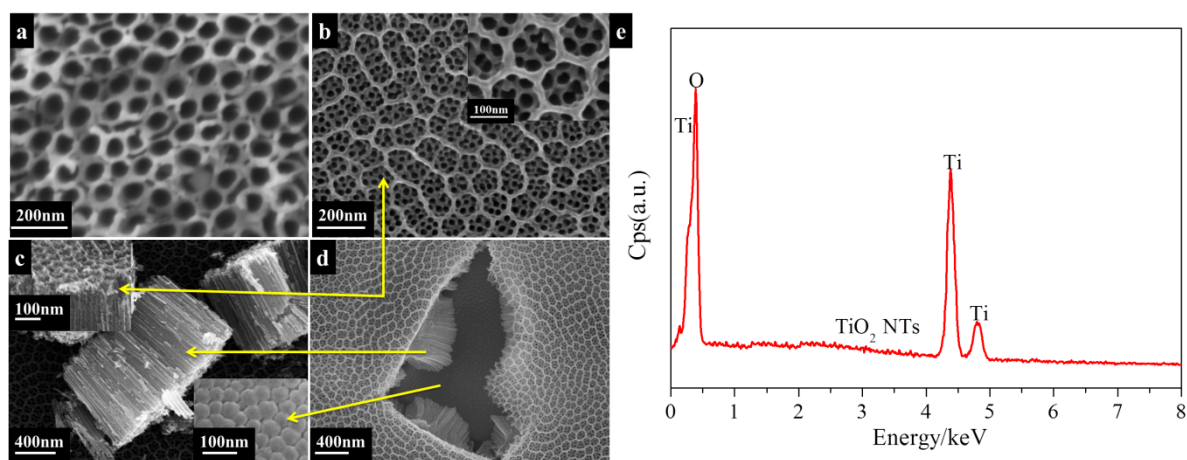

**Figure S5.** Morphology of TiO<sub>2</sub> NTs: (a) TiO<sub>2</sub> NTs in the one-step anodization; (b) hierarchical TiO<sub>2</sub> NTs in the two-step anodization; (c)(d) side view and the place of fracture of TiO<sub>2</sub> NTs; (e) EDS spectra of two-step TiO<sub>2</sub> NTs.

### References

- 1 Z. Zhang, L. Zhang, M. N. Hedhili, H. Zhang, and P. Wang. Nano Lett. 2013, **13**, 14.
